# Supplementary material
Source: Springer Nature journal article supplement (https://www.springermedizin.de/resource/supplementary/12874_2012_884_MOESM1_ESM.pdf/9433100)

PH- Proportional Hazards

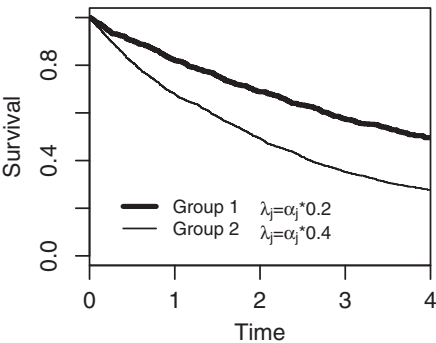

ED- Early Difference

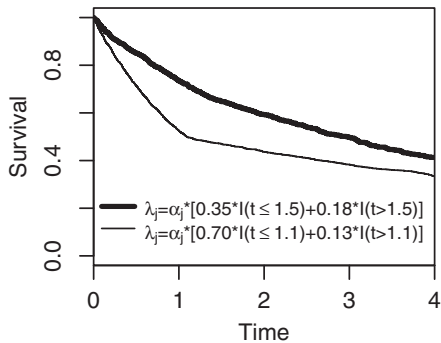

LD- Late Difference

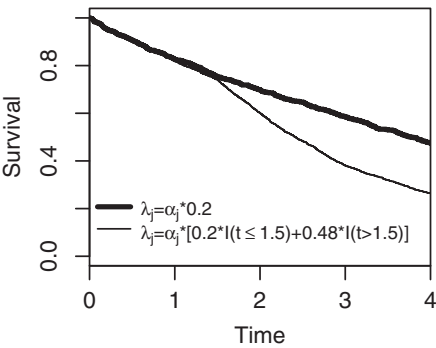

CH- Crossing Hazards

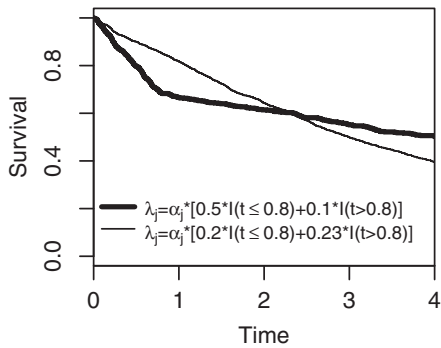

Supplement: MOESM1 [file 9433100]
